# Supplementary material
Source: Springer Nature journal article supplement (https://www.springermedizin.de/resource/supplementary/13058_2013_3413_MOESM2_ESM.pdf/9704102)
Supplement: MOESM2 [file 9704102]

**Table S2** Values of YC-1 IC<sub>50</sub> (μM) in breast cancer cell lines.

| Cell line  | ERα | PR | HER2 | IC <sub>50</sub> |
|------------|-----|----|------|------------------|
| AU565      | -   | -  | +    | 1.3 *            |
| BT474      | +   | +  | +    | 319              |
| HCC1937    | -   | -  | -    | 253              |
| MCF7       | +   | +  | -/+  | 131              |
| MCF7-HER2  | +   | +  | +    | 187              |
| MCF7-LCC9  | +   | ++ | -    | 2.6 *            |
| MCF7-LTED  | ++  | +  | -/+  | 4.9 *            |
| MCF7-LY2   | +   | ++ | -    | 2.3 *            |
| MCF10A     | -   | -  | -    | 99               |
| MDA-MB-231 | -   | -  | -    | 4,482            |
| MDA-MB-453 | -   | -  | -    | 250              |
| MDA-MB-468 | -   | -  | -    | 49               |
| SKBR3      | -   | -  | +    | 1.6 *            |
| T47D       | +   | +  | -/+  | 8.2 *            |
| ZR751      | +   | -  | -/+  | 0.3 *            |

\* IC<sub>50</sub> < 10 μM

!
